# Supplementary material
Source: PubMed Central journal article supplement (PMC7001498)
Supplement: EMBR-21-e48781-s001.pdf [file EMBR-21-e48781-s001.pdf]

## Expanded View Figures

### Figure EV1. Characteristics of a mouse model of type 2 diabetic nephropathy.

- A Schema illustrating mouse model of type 2 diabetic nephropathy (DN) using high fat diet (HFD) and a single-dose streptozotocin (50 mg/kg) intraperitoneal injection.
  - B Increment change of body weight in  $eNOS^{+/+}$  ND,  $eNOS^{+/+}$  HFD+STZ,  $eNOS^{-/-}$  ND and  $eNOS^{-/-}$  HFD+STZ.
  - C, D HbA1c% (C) and plasma insulin level (D) change in  $eNOS^{+/+}$  ND,  $eNOS^{+/+}$  HFD+STZ,  $eNOS^{-/-}$  ND and  $eNOS^{-/-}$  HFD+STZ after 24 weeks of treatment.
  - E Periodic acid–Schiff (PAS) staining of sections from  $eNOS^{+/+}$  ND,  $eNOS^{+/+}$  HFD+STZ,  $eNOS^{-/-}$  ND and  $eNOS^{-/-}$  HFD+STZ mouse kidneys. Scale bars: 50  $\mu$ m.
  - F Urinary albumin/creatinine ratio changes from  $eNOS^{+/+}$  ND,  $eNOS^{+/+}$  HFD+STZ,  $eNOS^{-/-}$  ND and  $eNOS^{-/-}$  HFD+STZ mouse.
  - G Serum cystatin C changes from  $eNOS^{+/+}$  ND,  $eNOS^{+/+}$  HFD+STZ,  $eNOS^{-/-}$  ND and  $eNOS^{-/-}$  HFD+STZ mouse.
- Data information: One-way ANOVA was performed. Data are shown as mean  $\pm$  SD from groups of eight mice. \* $P < 0.05$ , \*\* $P < 0.01$ , \*\*\* $P < 0.001$ , \*\*\*\* $P < 0.0001$ , N.S.,  $P > 0.05$ .

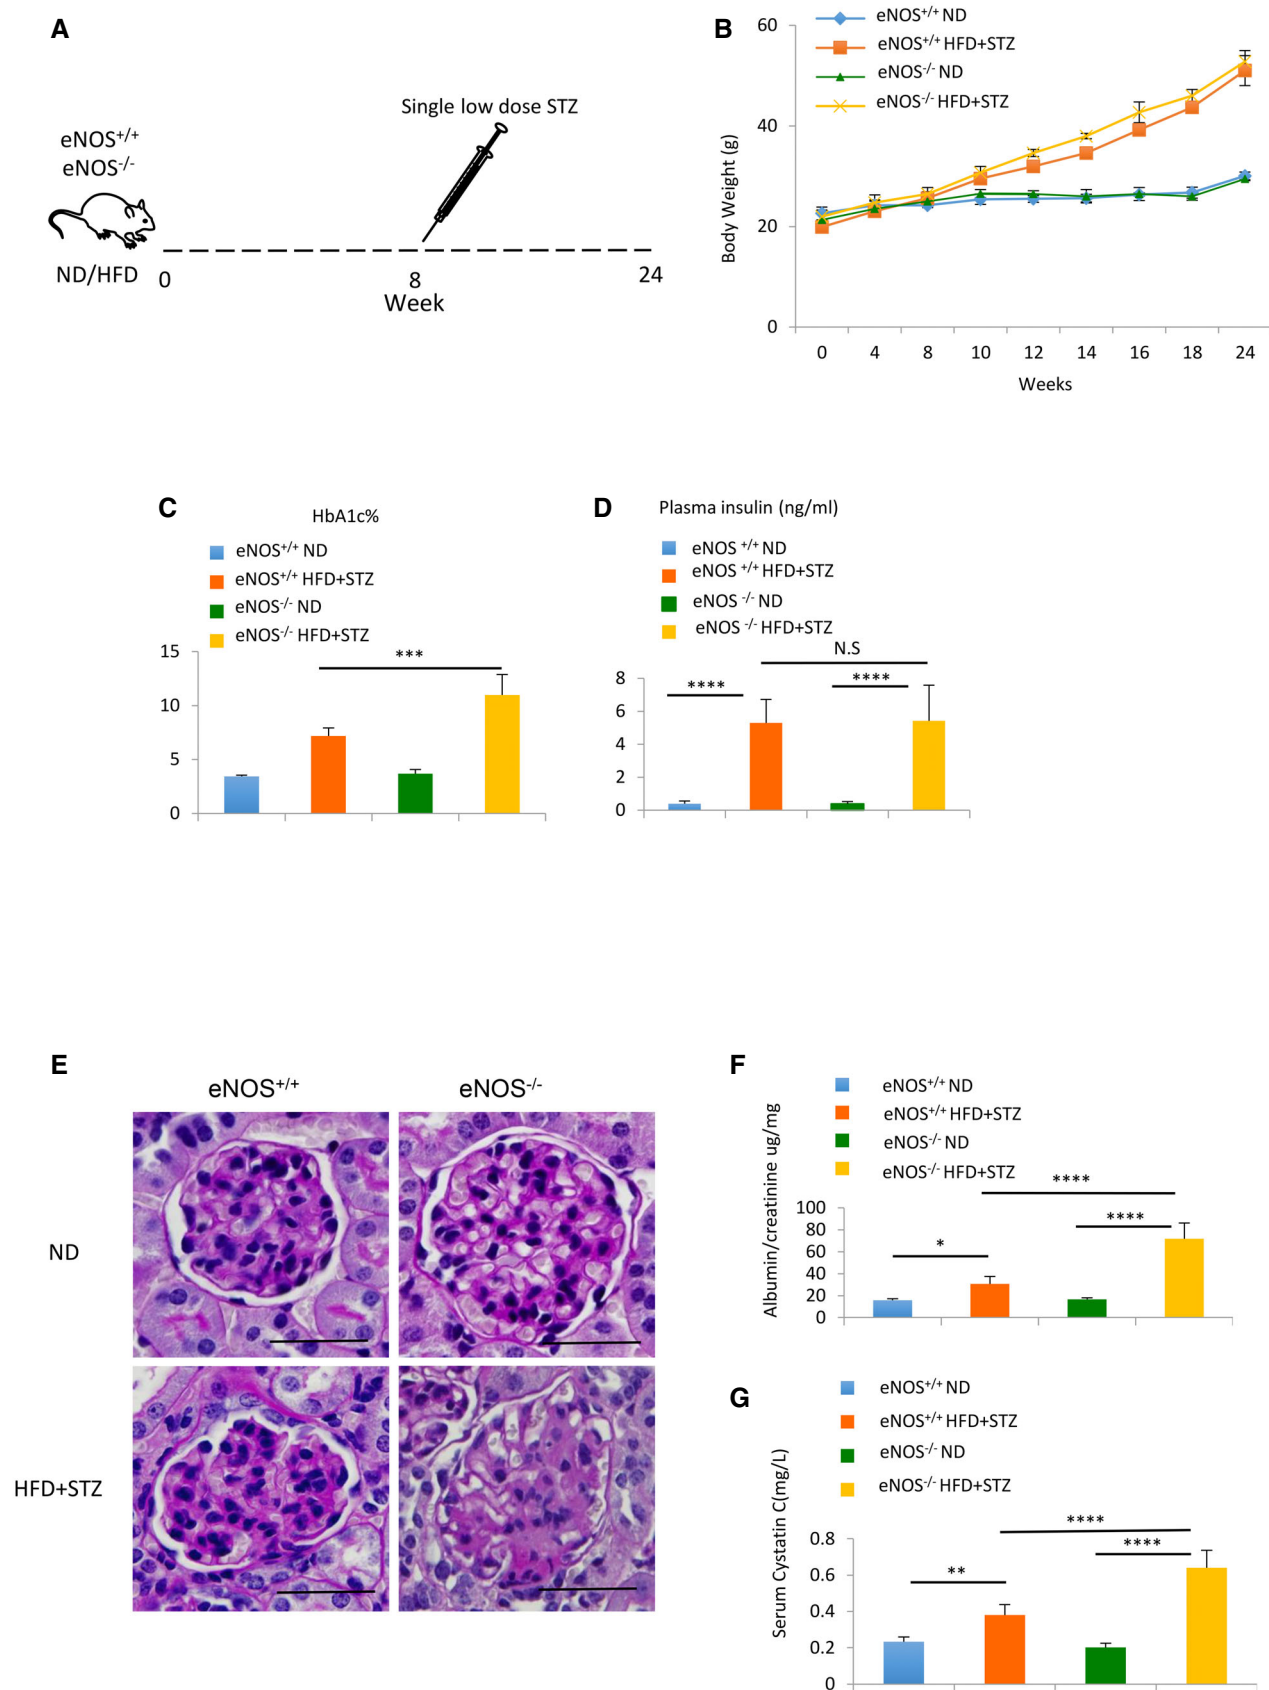

Figure EV1.

**Figure EV2. Smad4 LNA administration retards the progression of mouse type 2 diabetic nephropathy.**

A–C Changes in body weight, fasting blood glucose levels and plasma insulin in age-matched, control-LNA (CTL LNA)-treated or Smad4 LNA-treated type 2 diabetic  $eNOS^{-/-}$  mice.

D, E Glucose tolerance test (E) and quantification of glucose tolerance test (D) in age-matched, control-LNA (CTL LNA)-treated or Smad4 LNA-treated type 2 diabetic  $eNOS^{-/-}$  mice.

Data information: One-way ANOVA was performed. Data are shown as mean  $\pm$  SD from groups of 6 mice.

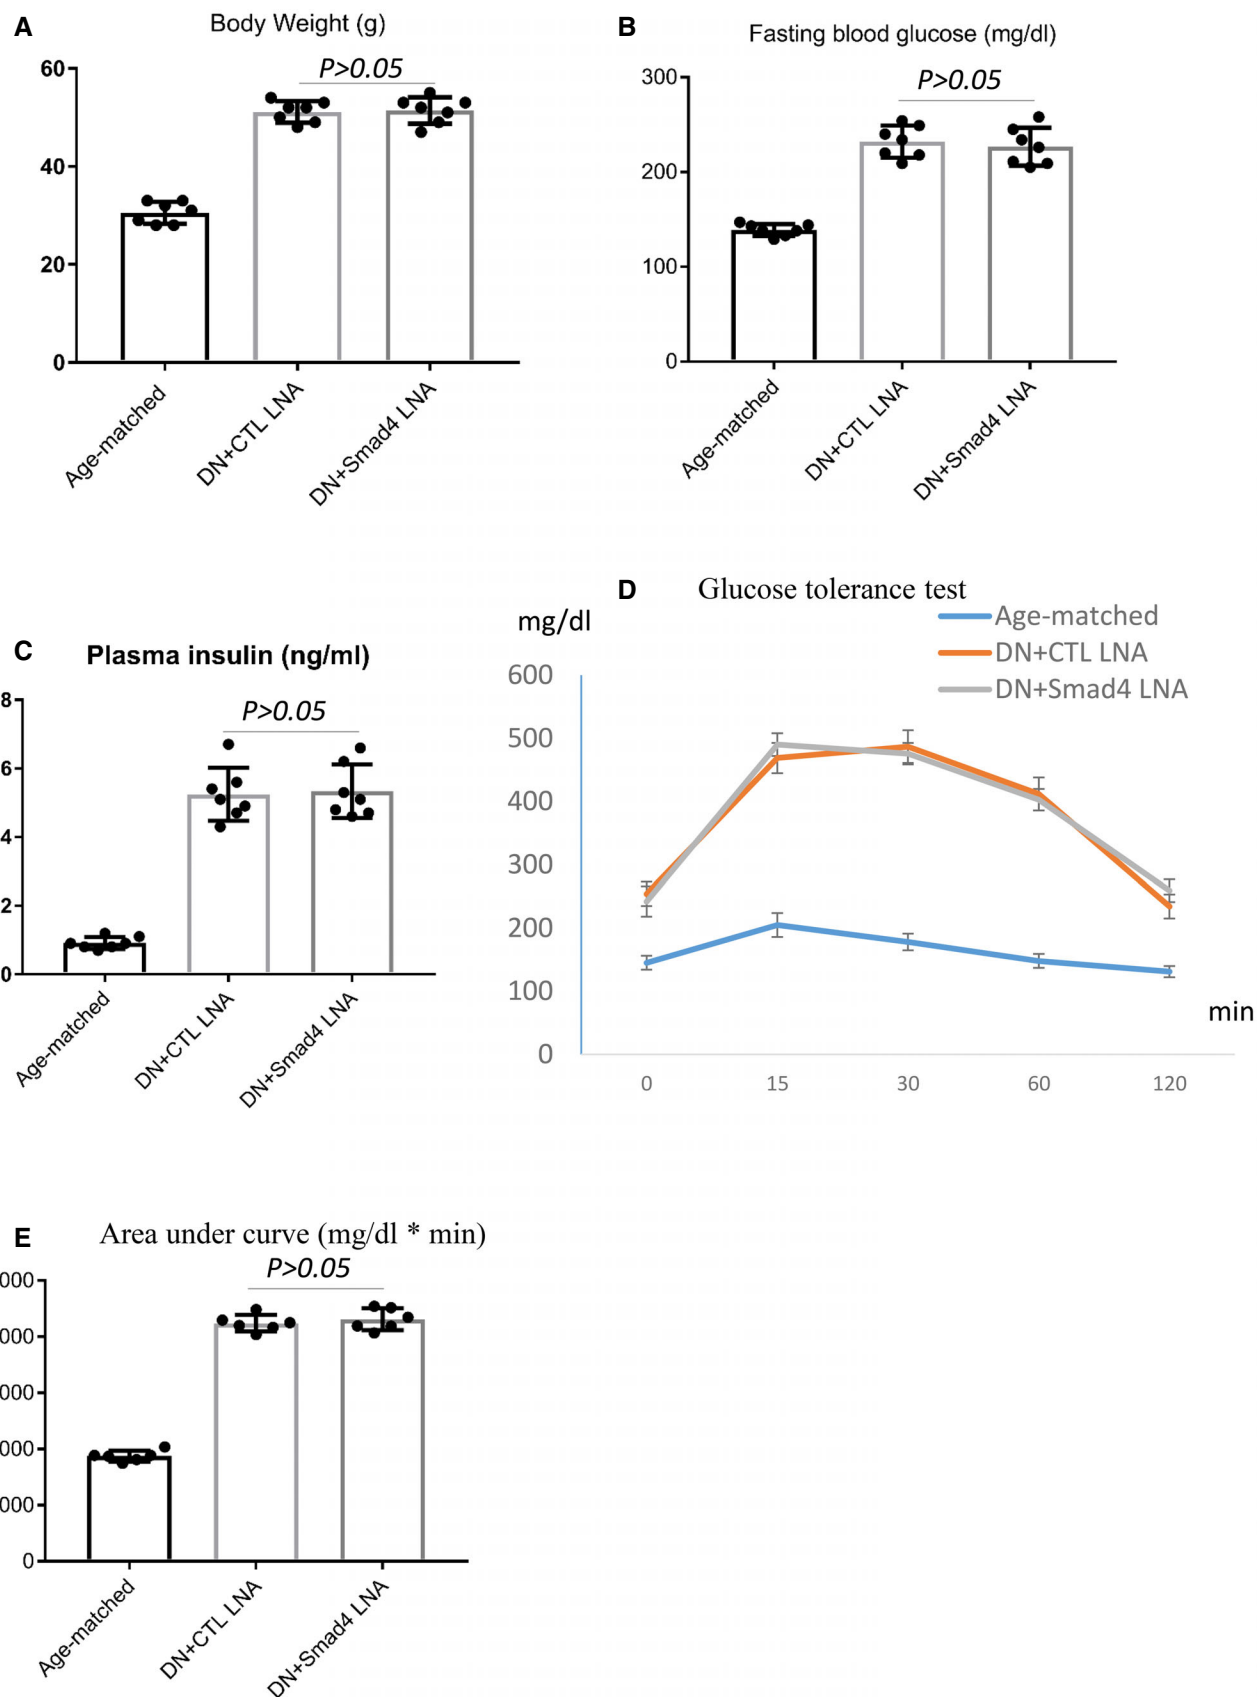

Figure EV2.

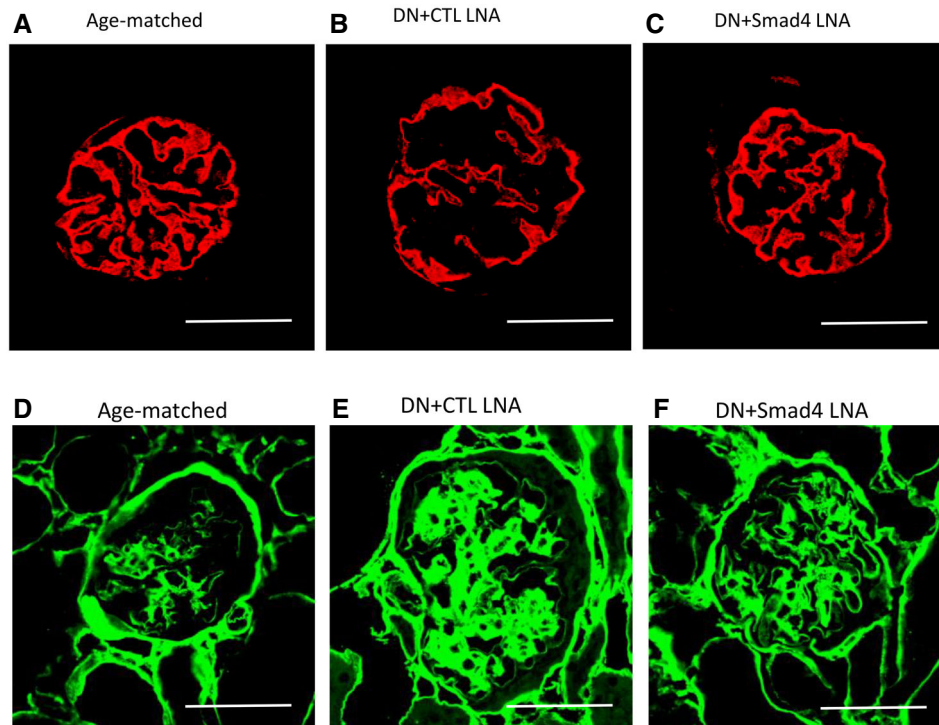

**Figure EV3. Smad4 LNA treatment decreases podocyte injury and glomerulosclerosis in type 2 diabetic nephropathy.**

A–F Confocal microscopy demonstrated synaptopodin (red, A–C) and collagen IV expression (green, D–F) in age-matched kidney, CTL LNA-treated diabetic nephropathy and Smad4 LNA-treated diabetic nephropathy. Scale bars: 50  $\mu$ m.

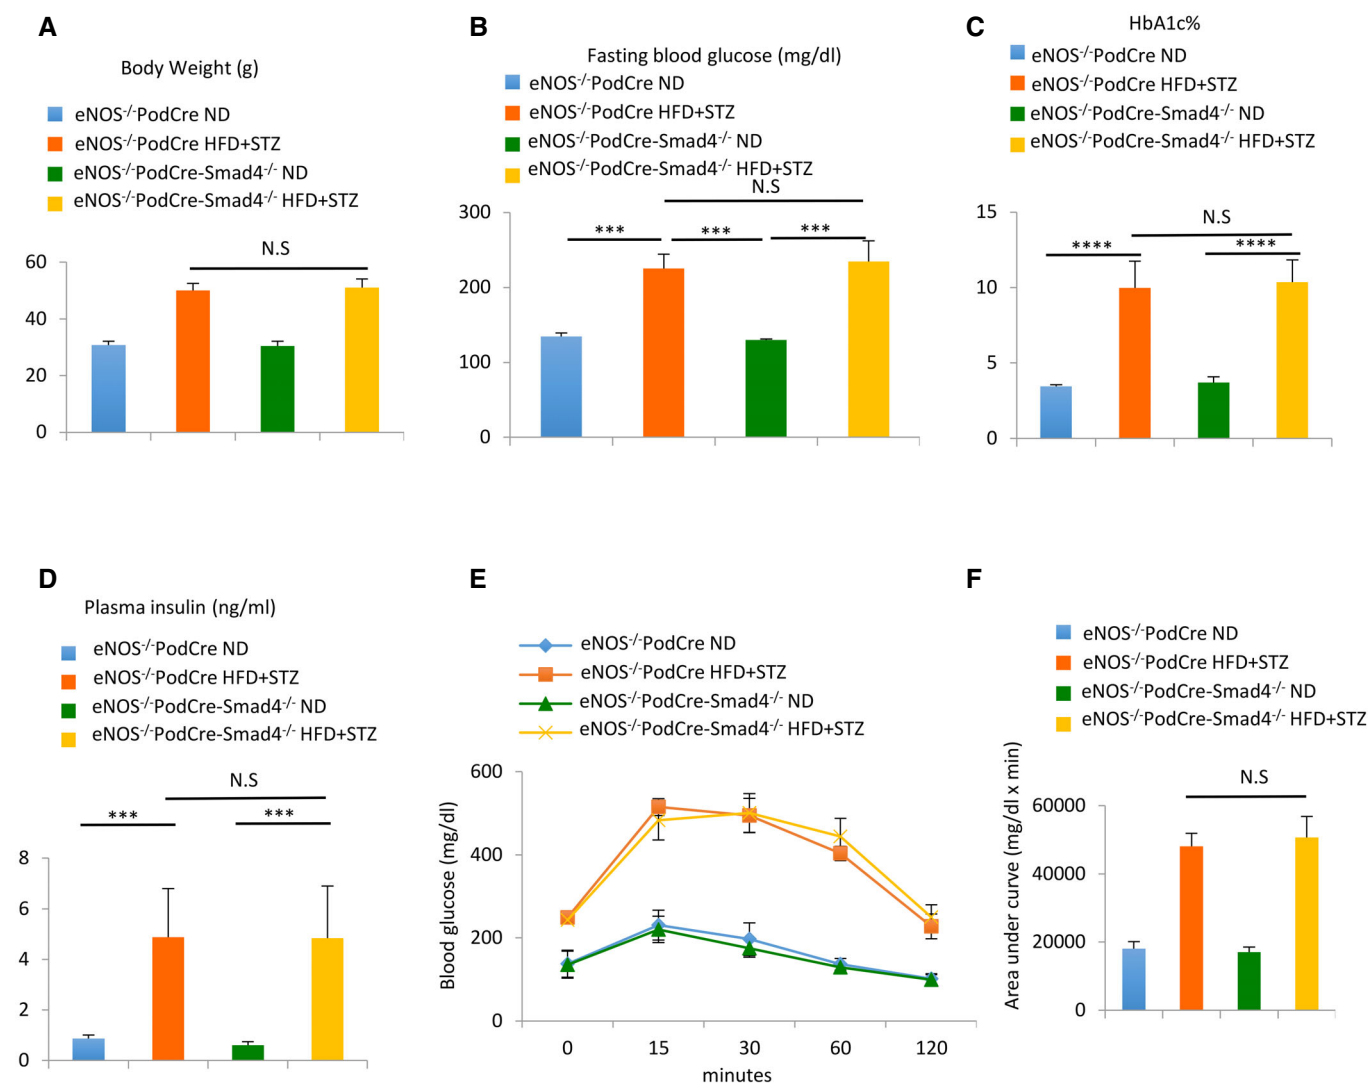

**Figure EV4. Smad4 deficiency in podocytes protects mice from type 2 diabetic nephropathy.**

A–D Changes in body weight, fasting blood glucose levels, HbA1c and plasma insulin in ND-treated or HFD+STZ-treated eNOS<sup>-/-</sup> PodCre mice or eNOS<sup>-/-</sup> PodCre-Smad4<sup>-/-</sup> mice.

E, F Glucose tolerance test (E) and quantification of glucose tolerance test (F) in ND-treated or HFD+STZ-treated eNOS<sup>-/-</sup> PodCre mice or eNOS<sup>-/-</sup> PodCre-Smad4<sup>-/-</sup> mice.

Data information: One-way ANOVA was performed. Data are shown as mean ± SD from groups of eight mice. N.S.,  $P > 0.05$ ; \*\*\* $P < 0.001$ ; \*\*\*\* $P < 0.0001$ .

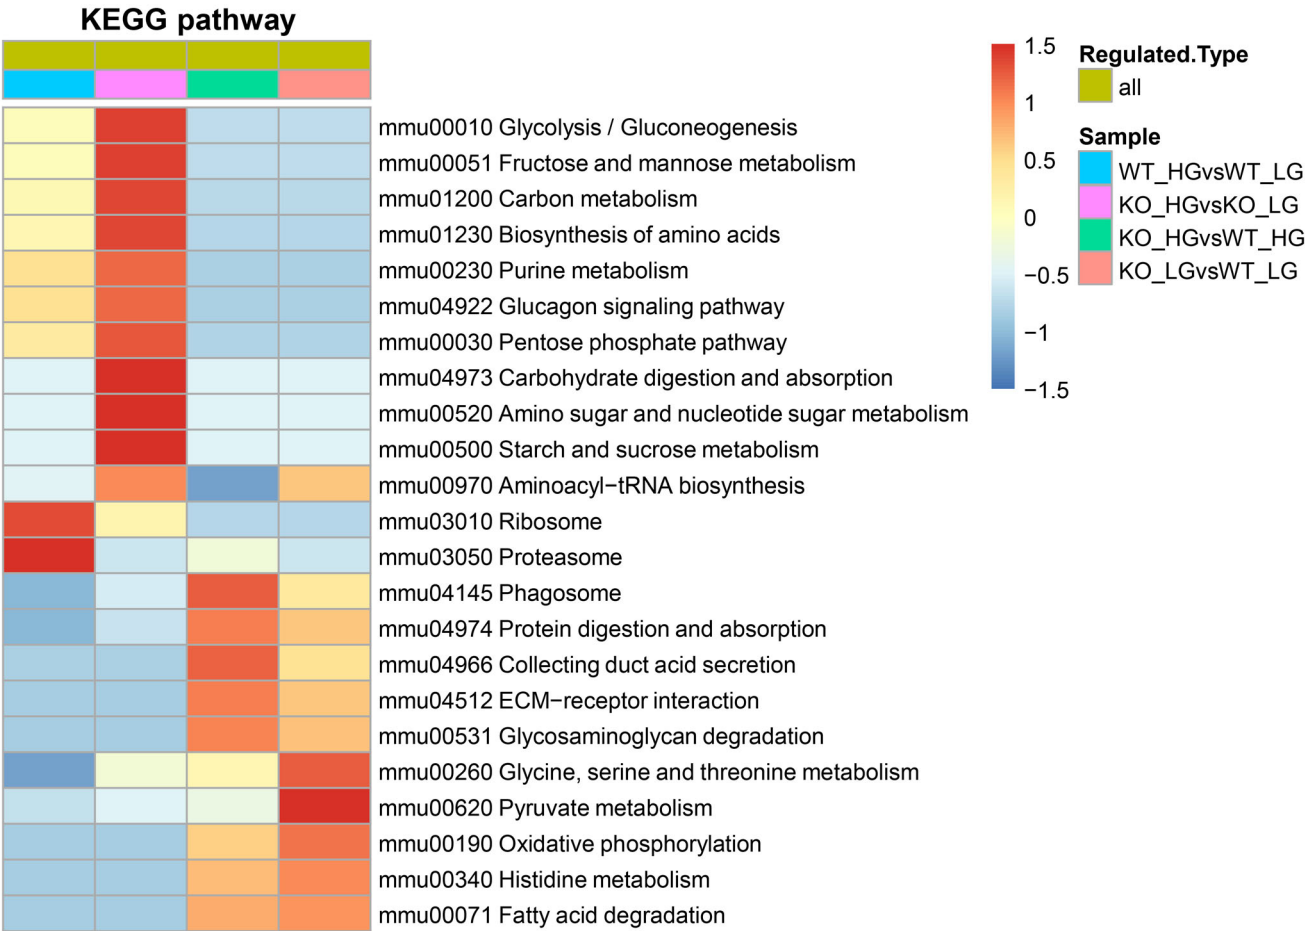

Figure EV5. Encyclopedia of Genes and Genomes (KEGG) database annotates protein pathways in wild-type or Smad4-deficient podocytes treated with normal glucose (NG) or high glucose (HG).
